# Supplementary material
Source: MDPI journal article supplement (https://www.mdpi.com/2311-5521/8/5/154)
Supplement: s1 [file s1]

## Supplementary Materials:

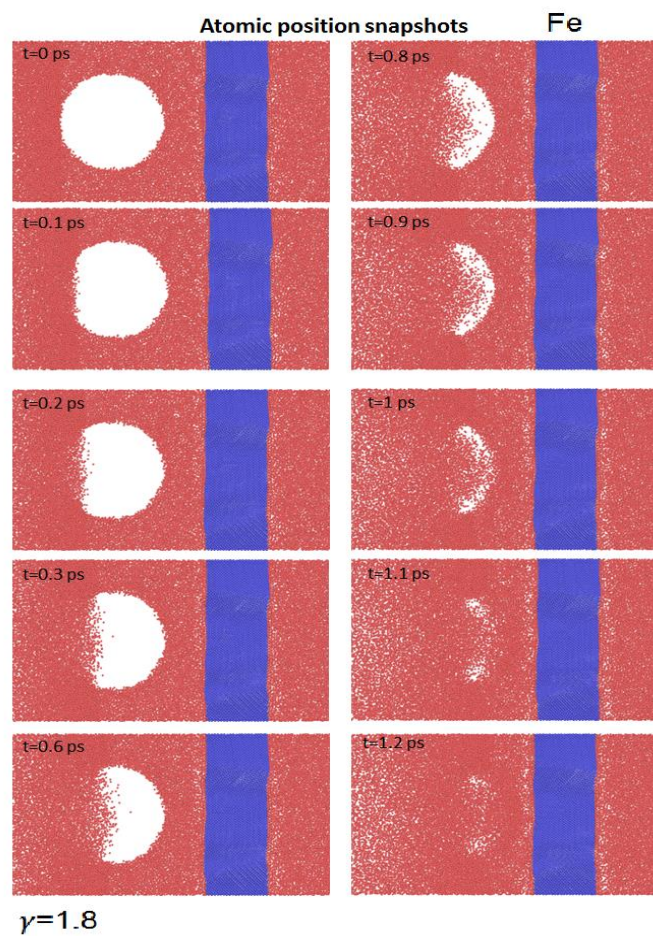

**Figure S1:** Atomic position snapshots of the collapse dynamics of a single nanobubble near Iron (Fe) at relative wall distance  $\gamma = 1.8$

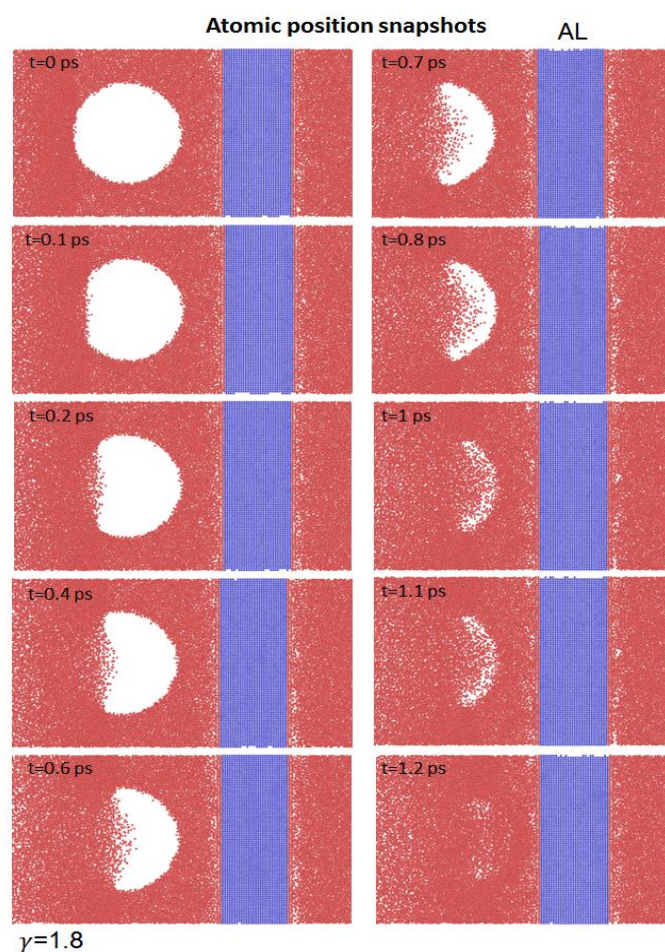

**Figure S2:** Atomic position snapshots of the collapse dynamics of a single nanobubble near Aluminum (Al) at relative wall distance  $\gamma = 1.8$

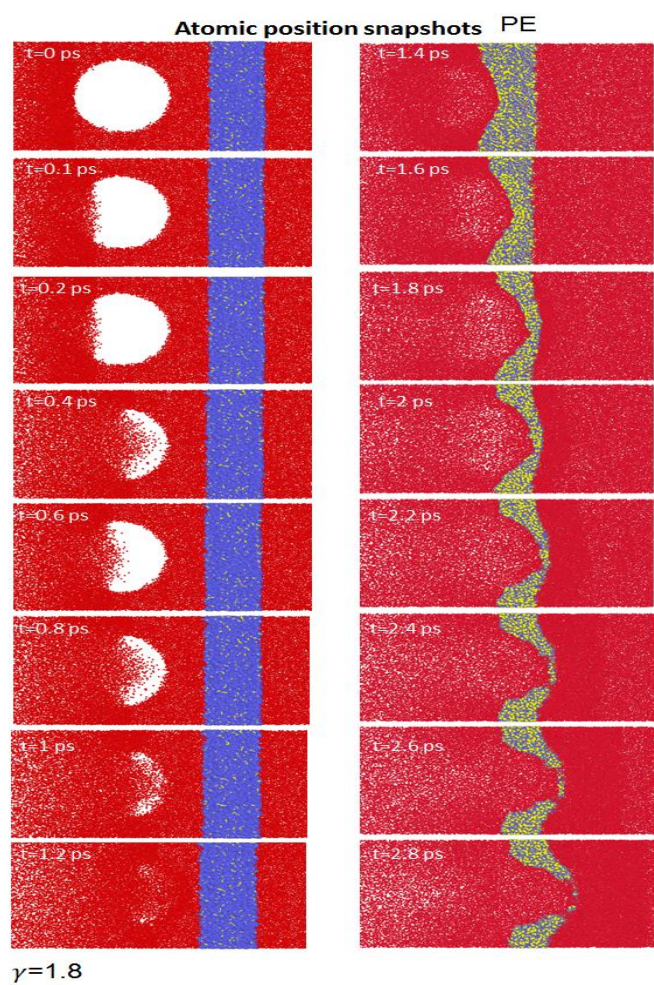

**Figure S3:** Atomic position snapshots of the collapse dynamics of a single nanobubble near Polyethylene (PE) at relative wall distance  $\gamma = 1.8$
